# Supplementary material for: Atmospheric blocking types: Frequencies and transitions
Source: Copernicus journal article supplement (doi:10.5194/wcd-2020-62), 2020-12-28
Supplement: Supplementary file 1 [file wcd-2020-62-supplement.zip]

Archive with 2 entries (2 files):
- Supplementary_material/Blocking_example.mp4
- Supplementary_material/Supplementary_material_freva_config_and_blocking_video.pdf
