# Supplementary material for: Atmospheric blocking types: Frequencies and transitions
Source: Copernicus journal article supplement (doi:10.5194/wcd-2020-62), 2020-12-28
Supplement: Supplementary file 1 [file wcd-2020-62-supplement.zip › Supplementary_material/Supplementary_material_freva_config_and_blocking_video.pdf]

# Supplementary material

## Atmospheric blocking types: Frequencies and transitions

December 23, 2020

In the following, we show additional results of the identification of atmospheric blocks. We summarize the freva configuration and the output as explained in the article in section 3, Step 1. Further, we give an example of the trapezoid method for the identification of High-over-Lows and Omega blocks as discussed in section section 3 Steps 2 and 3.

### Contents

|          |                                                                                                         |          |
|----------|---------------------------------------------------------------------------------------------------------|----------|
| <b>1</b> | <b>Configurations of the Freva Blocking tool</b>                                                        | <b>2</b> |
| <b>2</b> | <b>Freva Output Figures</b>                                                                             | <b>3</b> |
| 2.1      | Central Reference Blocking Latitude (CRBL) for NCEP-DOE Reanalysis 2 data (1990-2019) . . . . .         | 3        |
| 2.2      | Daily Central Reference Blocking Latitude (CRBL) in a Hovmöller diagram . . . . .                       | 4        |
| 2.3      | Instantaneous Blocked Longitude for NCEP-DOE Reanalysis 2 data (1990-2019) split to months . . . . .    | 5        |
| 2.4      | Instantaneous Blocked Longitude (IBL) split to seasons . . . . .                                        | 6        |
| 2.5      | Daily Instantaneous Blocked Longitude (IBL) Frequency (Hovmöller diagram) . . . . .                     | 7        |
| <b>3</b> | <b>Movie to a blocking event example broadcasting the methods (Step 2 and 3) described in the paper</b> | <b>8</b> |
|          | <b>References</b>                                                                                       | <b>9</b> |

# 1 Configurations of the Freva Blocking tool

| Tool configuration of Blocking Plugin Richling et al. (2015) |            |                                                                                                                                                                                           |
|--------------------------------------------------------------|------------|-------------------------------------------------------------------------------------------------------------------------------------------------------------------------------------------|
| climyear_range                                               | 1990, 2019 | range of years of long-term time period for calculation of CRBL and/or threshold criterion for geopotential height. Use only if "GEOPcrit_calc" and/or "CRBL_calc" are/is set "True"      |
| year_range                                                   | 1990, 2019 | range of years to be processed                                                                                                                                                            |
| CRBL_const                                                   | False      | Option to set CRBL (Central Reference Blocking Latitude - latitudinal location of mean zonal flow which may be blocked) to a constant latitude location (for all seasons and longitudes). |
| CRBL_calc                                                    | True       | Option to calculate seasonal (for every calendar day) and longitudinal varying CRBL. Use only if "CRBL_const" is set "False"!                                                             |
| CRBL_file                                                    | None       | Option to input a file of seasonal (for every calendar day) and longitudinal varying CRBL. Use only if "CRBL_const" and "CRBL_calc" are set "False"!                                      |
| GHGN_crit                                                    | -10        | Criterion of GHGN (geopotential height gradient north (SH: south) of blocking high [in gpm/deg_north])                                                                                    |
| GHGS_crit                                                    | 0.0        | Criterion of GHGS (geopotential height gradient south (SH: north) of blocking high [in gpm/deg_north])                                                                                    |
| GEOPcrit_calc                                                | True       | Option to calculate threshold criterion for geopotential height (long-term mean) at each grid point for every calendar day.                                                               |
| GEOPcrit_file                                                | None       | Option to input file of threshold criterion for geopotential height. Use only if "GEOPcrit_calc" is set "False".                                                                          |
| daymean                                                      | False      | Option to calculate daily mean of geopotential height before calculating IBL.                                                                                                             |
| hemisphere                                                   | NH         | northern hemisphere                                                                                                                                                                       |
| grid                                                         | r144x72    | Specify a regular lon-lat grid (gridfile or grid description)                                                                                                                             |
| delta                                                        | 10.0       | Possible latitudinal northward and southward shifting of CRBL [in deg_lat]                                                                                                                |
| level                                                        | 50000      | level [in Pa]                                                                                                                                                                             |
| ntask                                                        | 6          | Number of tasks                                                                                                                                                                           |
| Data specifics                                               |            | (this is specific to the freva server and how it stores the data)                                                                                                                         |
| institute                                                    | ncep-ncar  |                                                                                                                                                                                           |
| ensemble                                                     | r1i1p1     |                                                                                                                                                                                           |
| experiment                                                   | ncep2      |                                                                                                                                                                                           |
| product                                                      | reanalysis |                                                                                                                                                                                           |
| project                                                      | schieli    |                                                                                                                                                                                           |
| model                                                        | cdas       |                                                                                                                                                                                           |
| time_frequency                                               | 6hr        |                                                                                                                                                                                           |
| Number of freva run                                          | 25002      |                                                                                                                                                                                           |

## 2 Freva Output Figures

Freva generates output figures which are displayed in the following subsections. A description is added to the caption of the figures.

### 2.1 Central Reference Blocking Latitude (CRBL) for NCEP-DOE Reanalysis 2 data (1990-2019)

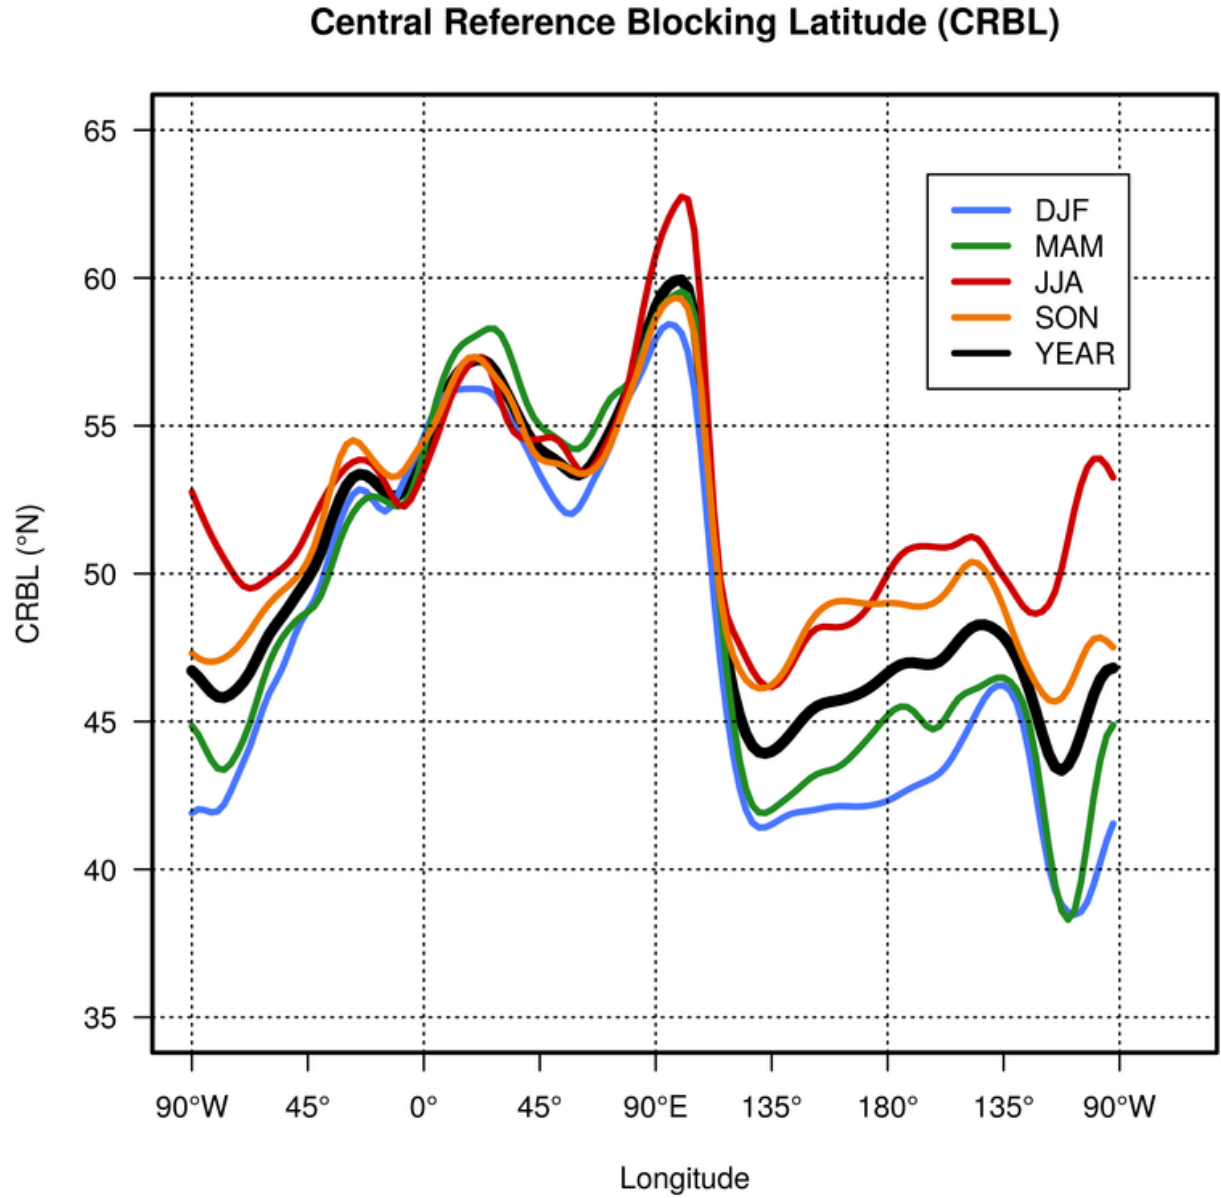

Figure 1: The yearly Central Reference Blocking Latitude (CRBL) frequency for every longitude seasonal averaged is shown.

## 2.2 Daily Central Reference Blocking Latitude (CRBL) in a Hovmöller diagram

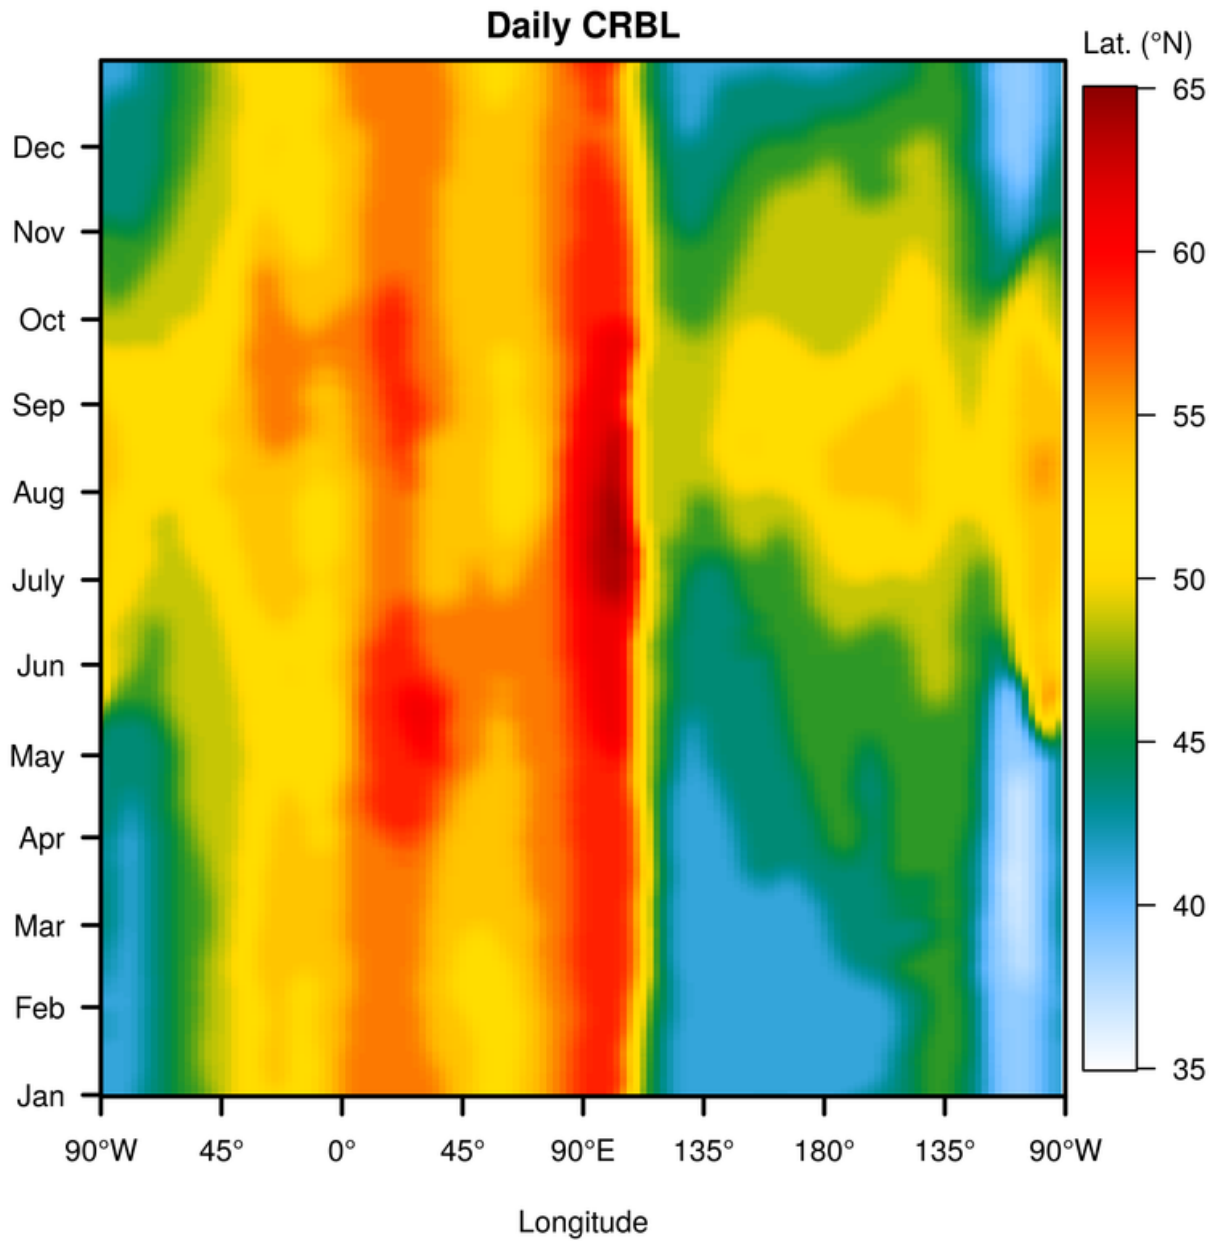

Figure 2: Central Reference Blocking Latitude (CRBL) for every longitude and each calendar day of the year represented in a Hovmöller diagram.

### 2.3 Instantaneous Blocked Longitude for NCEP-DOE Reanalysis 2 data (1990-2019) split to months

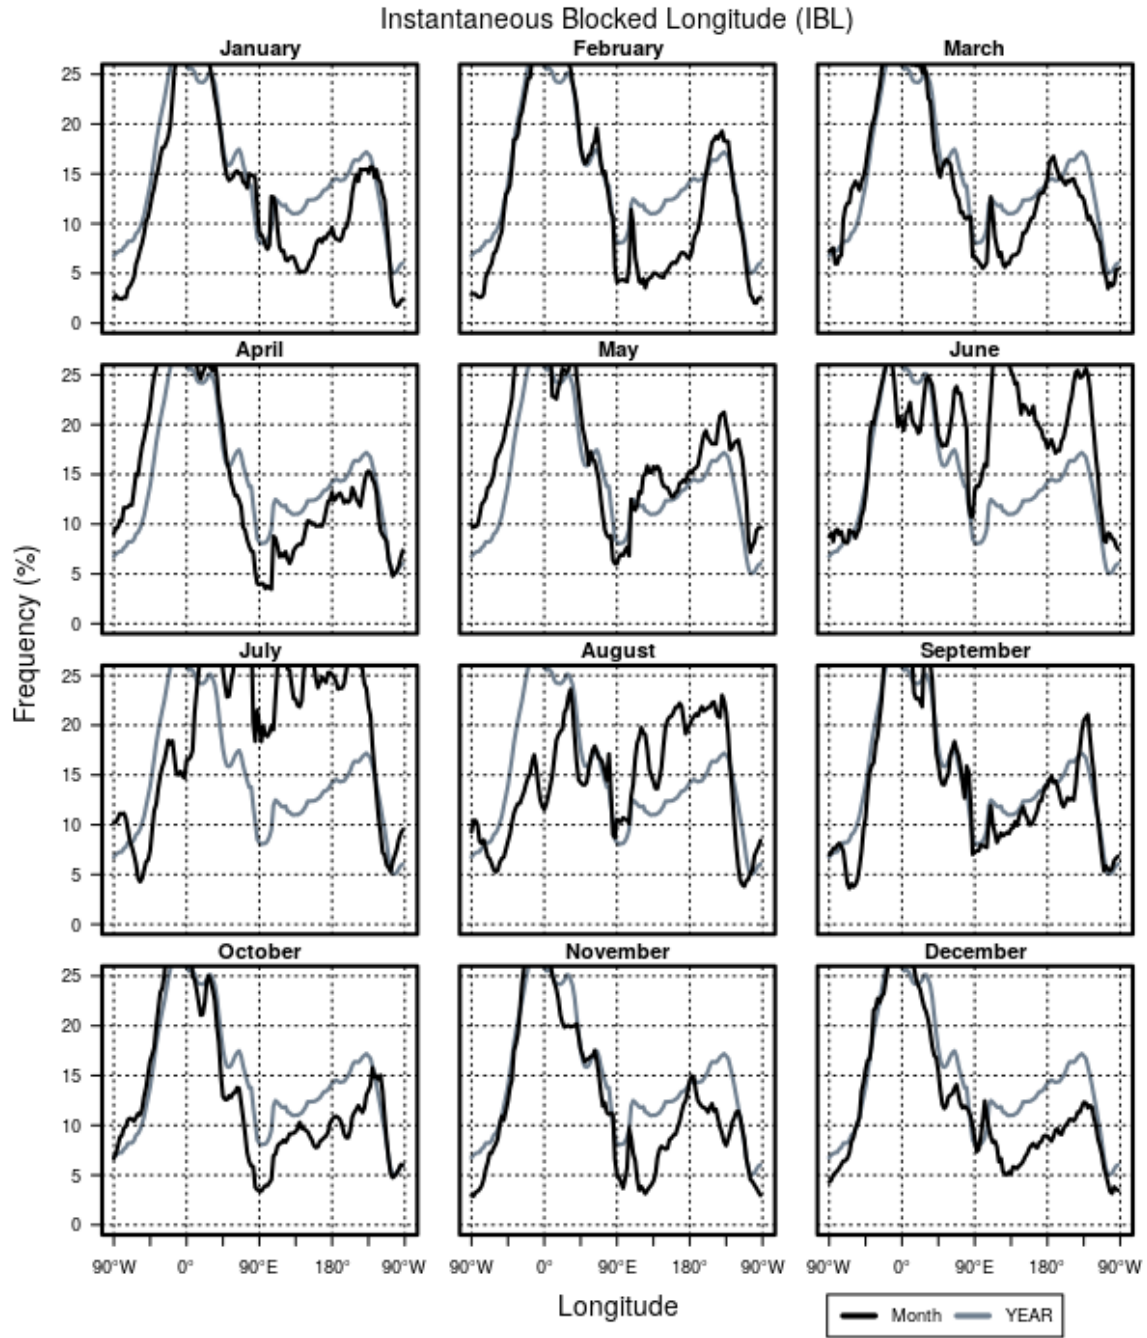

Figure 3: The yearly Instantaneous Blocked Longitude (IBL) frequency for every longitude and monthly averaged is shown.

## 2.4 Instantaneous Blocked Longitude (IBL) split to seasons

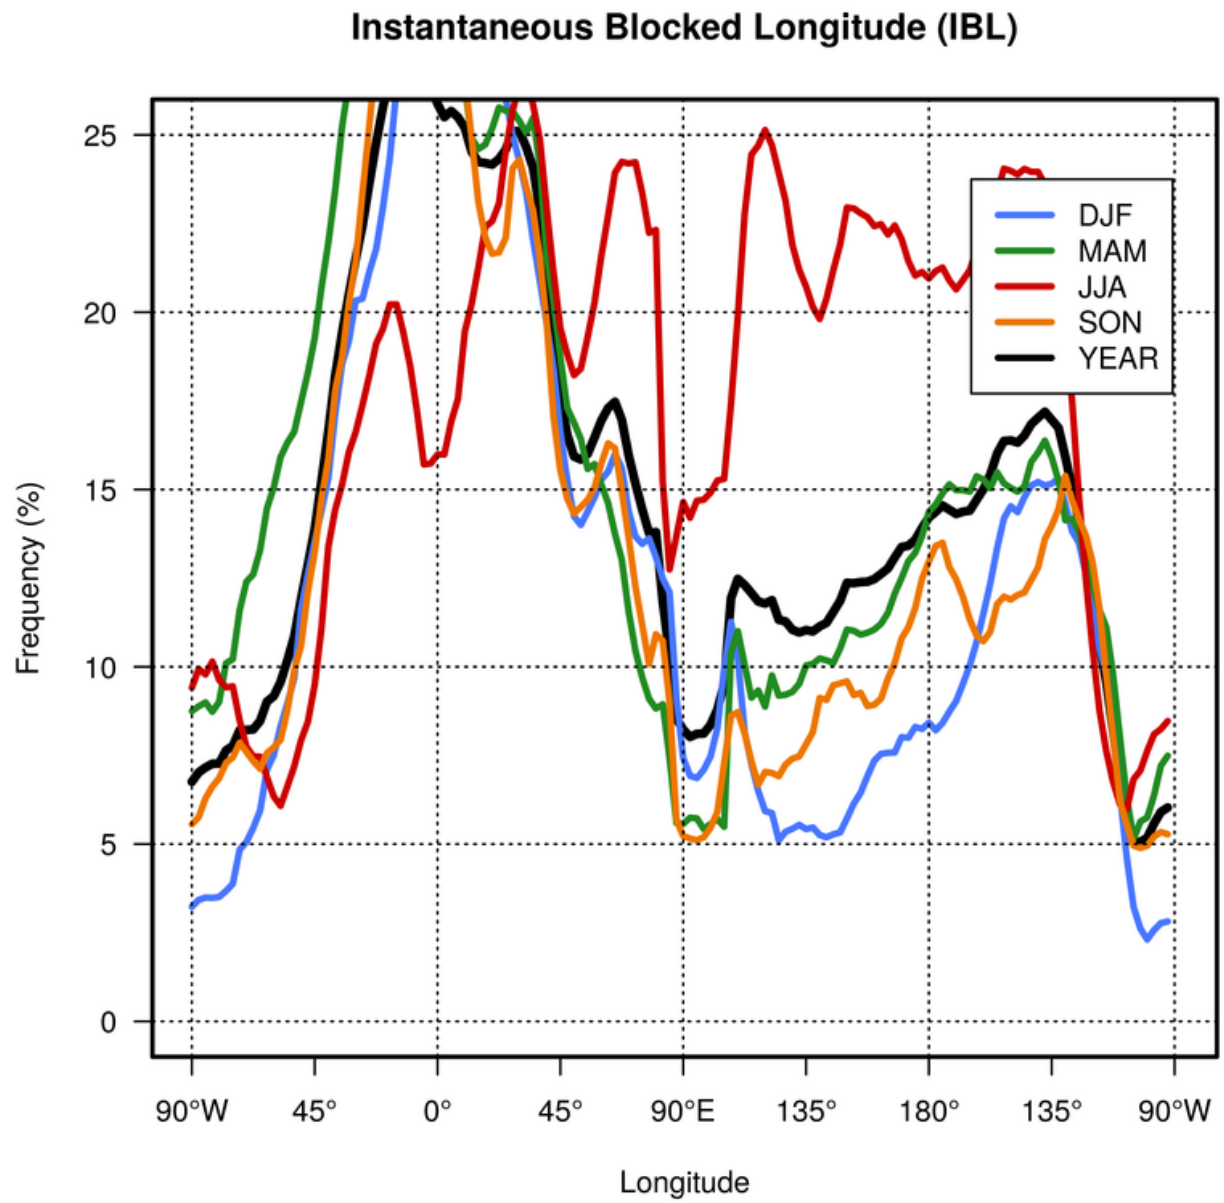

Figure 4: The yearly Instantaneous Blocked Longitude (IBL) frequency for every longitude seasonal averaged is shown.

## 2.5 Daily Instantaneous Blocked Longitude (IBL) Frequency (Hovmöller diagram)

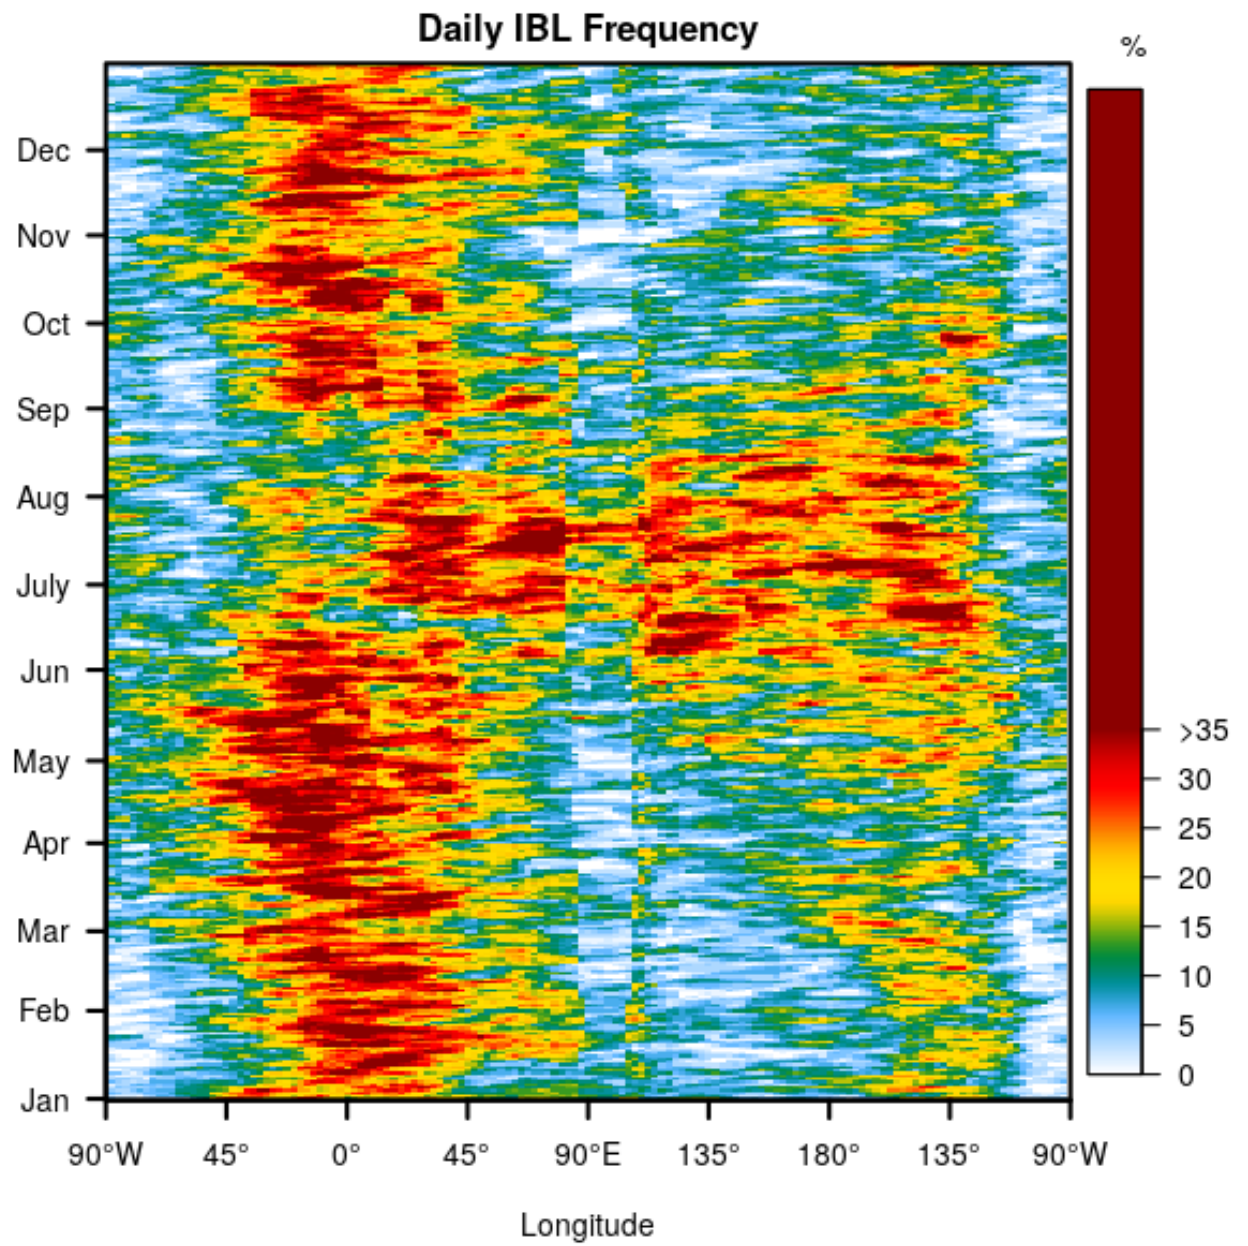

Figure 5: The yearly Instantaneous Blocked Longitude (IBL) frequency for every longitude and each calendar day of the year is represented in a Hovmöller diagram.

### 3 Movie to a blocking event example broadcasting the methods (Step 2 and 3) described in the paper

The file is called *Blocking\_example.mp4* and is an extra file. If you happen to have Adobe Reader, you can directly start the movie in the pdf-Version of this document by clicking on the panels below the figure.

Displayed is an example blocking event, observed between 23 June 2019 6 UTC and 29 June 2019 6 UTC (time interval of 6 hours), that include a transition between *Omega* and *High-over-Low* blocking states. Shaded areas represent the identified vortex field ( $W_k > 1$ , see also Schielicke et al. 2016) which is colored by vorticity (in  $10^{-5}s^{-1}$ ; blue: anticyclonic; yellow cyclonic). Black contours are isolines of geopotential height in 80 gpm intervals (thick black contour is the 5840 gpm isoline). The outline of the trapezoid/box is given for each time step, solid shape represent the identified shape; circles (crosses) are the circulation centroids of the identified high (red) and low(s) (blue) for the *Omega* (*High-over-Low*) pattern. The red bar(s) at the bottom of the figures shows the identified IBLs from Step 1. The figures for the movie were plotted with help of Matlab (2016) and coastlines were plotted with the built-in Matlab file *coast.mat*.

## References

- Matlab (2016), *MATLAB version 9.0.0.341360 (R2016a)*, The MathWorks Inc., Natick, Massachusetts.
- Richling, A., Kadow, C., Illing, S. & Kunst, O. (2015), ‘Freie Universität Berlin evaluation system (Freva) - blocking’, <https://freva.met.fu-berlin.de/about/blocking/>. (Documentation of the Blocking Plugin), Accessed: 2020-09-10.
- Schielicke, L., N  vir, P. & Ulbrich, U. (2016), ‘Kinematic vorticity number – a tool for estimating vortex sizes and circulations’, *Tellus A* **68**.  
**URL:** <http://www.tellusa.net/index.php/tellusa/article/view/29464/44875>
